# Supplementary material for: Beechwood carbohydrates for enzymatic synthesis of sustainable glycolipids
Source: PubMed Central journal article supplement (PMC5487819; doi:10.1186/s40643-017-0155-7), 2017-06-07

# Results LC-MS/MS calibration with glucose-octanoate

Script Help

Quantitate Mode

Sascha\_Octanoate\Octanoate\_

Full Layout  
Query: None  
Idle  
Sort: Unsorted

|   | Sample Name                  | Sample Type | Acquisition Method | File Name         | Analyte Peak Area (counts) | Analyte Peak Height (cps) | Analyte Concentration (ng/mL) | Analyte Retention Time (min) | Calculated Concentration (ng/mL) | Accuracy (%) |
|---|------------------------------|-------------|--------------------|-------------------|----------------------------|---------------------------|-------------------------------|------------------------------|----------------------------------|--------------|
| 1 | Blank L14_01_08              | Standard    | Octanoate_MRM_P    | Cal_Octanoate_15- | 1.50e+002                  | 3.09e+001                 | 0.00                          | 11.2                         | 17.3                             | N/A          |
| 2 | STD_Gluc_100ng in L14_01_04  | Standard    | Octanoate_MRM_P    | Cal_Octanoate_15- | 6.70e+003                  | 9.28e+002                 | 100.                          | 11.1                         | 98.3                             | 98.3         |
| 3 | STD_Gluc_200ng in L14_01_05  | Standard    | Octanoate_MRM_P    | Cal_Octanoate_15- | 1.50e+004                  | 1.91e+003                 | 200.                          | 11.1                         | 202.                             | 101.         |
| 4 | STD_Gluc_500ng in L14_01_06  | Standard    | Octanoate_MRM_P    | Cal_Octanoate_15- | 3.64e+004                  | 4.66e+003                 | 500.                          | 11.2                         | 466.                             | 93.2         |
| 5 | STD_Gluc_1000ng in L14_01_07 | Standard    | Octanoate_MRM_P    | Cal_Octanoate_15- | 8.09e+004                  | 1.12e+004                 | 1000.                         | 11.2                         | 1020.                            | 102.         |

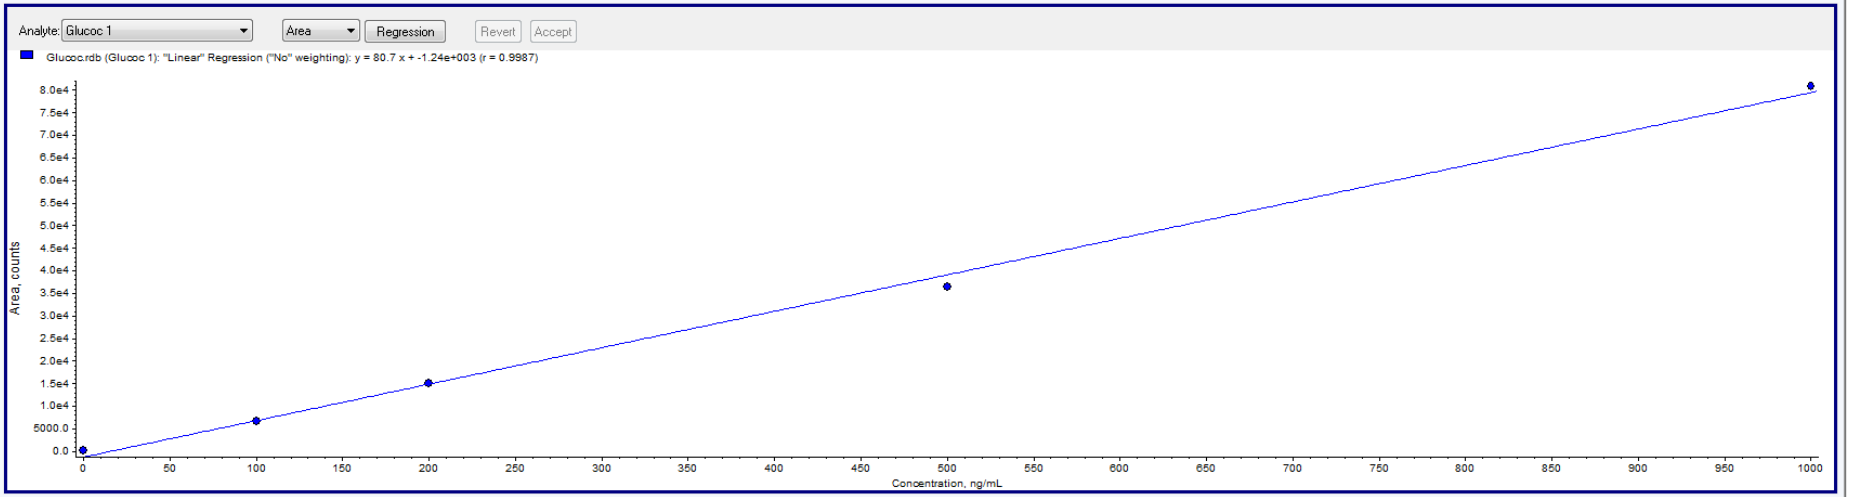

# Results LC-MS/MS calibration with xylose-octanoate

Quantitate Mode | Sascha\_Octanoate\Octanoate\_

Full Layout  
Query: None  
Idle  
Sort: Unsorted

|   | Sample Name               | Sample Type | Acquisition Method   | File Name         | Analyte Peak Area (counts) | Analyte Peak Height (cps) | Analyte Concentration (ng/mL) | Analyte Retention Time (min) | Calculated Concentration (ng/mL) | Accuracy (%) |
|---|---------------------------|-------------|----------------------|-------------------|----------------------------|---------------------------|-------------------------------|------------------------------|----------------------------------|--------------|
| 1 | Blank L14_01_08           | Standard    | Octanoate_MRM_POS_TI | Cal_Octanoate_15- | 2.04e+002                  | 3.87e+001                 | 0.00                          | 12.6                         | 6.04                             | N/A          |
| 2 | STD_Xyloc_100ng in L14_0  | Standard    | Octanoate_MRM_POS_TI | Cal_Octanoate_15- | 1.10e+004                  | 1.24e+003                 | 100.                          | 12.4                         | 102.                             | 102.         |
| 3 | STD_Xyloc_200ng in L14_0  | Standard    | Octanoate_MRM_POS_TI | Cal_Octanoate_15- | 2.24e+004                  | 2.56e+003                 | 200.                          | 12.6                         | 204.                             | 102.         |
| 4 | STD_Xyloc_500ng in L14_0  | Standard    | Octanoate_MRM_POS_TI | Cal_Octanoate_15- | 5.32e+004                  | 5.62e+003                 | 500.                          | 12.6                         | 478.                             | 95.6         |
| 5 | STD_Xyloc_1000ng in L14_0 | Standard    | Octanoate_MRM_POS_TI | Cal_Octanoate_15- | 1.13e+005                  | 1.31e+004                 | 1000.                         | 12.4                         | 1010.                            | 101.         |

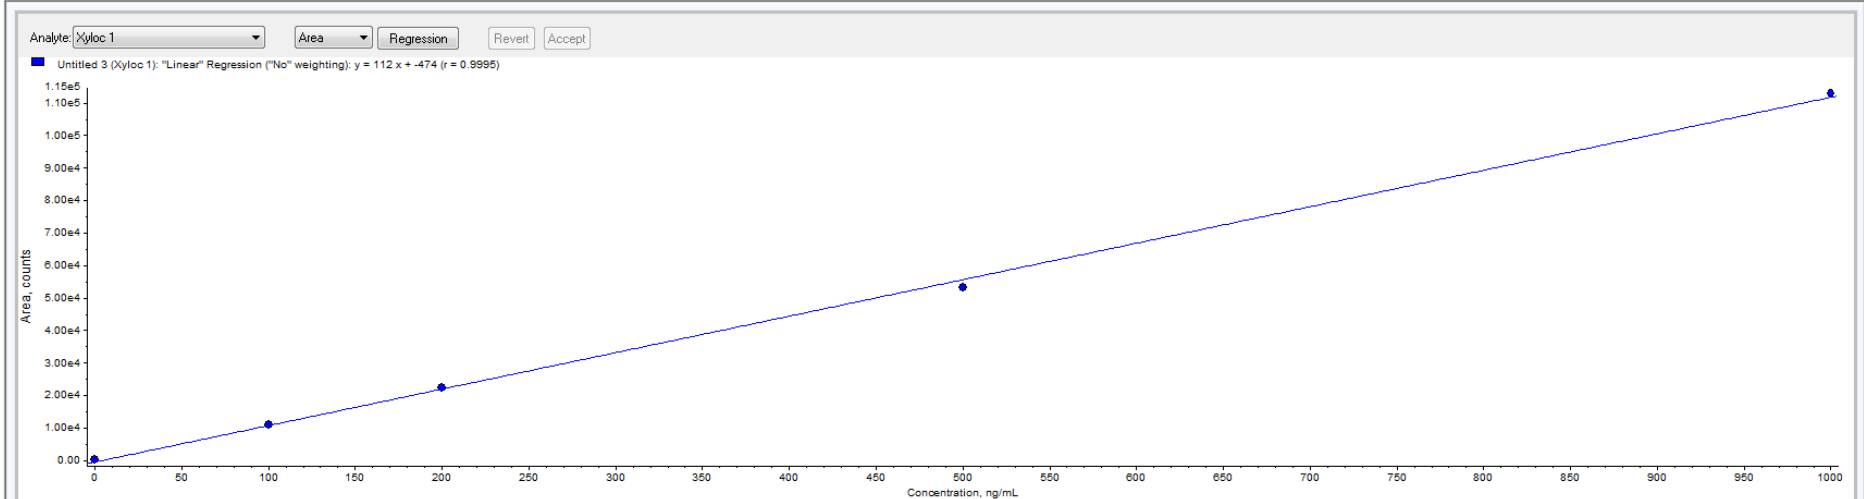

Supplement: 40643_2017_155_MOESM1_ESM.pdf [file 40643_2017_155_MOESM1_ESM.pdf]
