# Supplementary material for: Beechwood carbohydrates for enzymatic synthesis of sustainable glycolipids
Source: PubMed Central journal article supplement (PMC5487819; doi:10.1186/s40643-017-0155-7), 2017-06-07
Supplement: 40643_2017_155_MOESM4_ESM.pdf [file 40643_2017_155_MOESM4_ESM.pdf]

| $\beta$ -Glucose                                | C Shift [ppm] | H Shift [ppm] | Multiplicity | Coupling [Hz] |
|-------------------------------------------------|---------------|---------------|--------------|---------------|
| —C <sup>1</sup> H—O—                            | 92.41         | 5.26          | d            | 7.2           |
| —C <sup>2</sup> H—                              | 73.87         | 3.52          | Overlap      | n.d.          |
| —C <sup>3</sup> H—                              | 73.94         | 3.82          | Overlap      | n.d.          |
| —C <sup>4</sup> H—                              | 70.18         | 3.42          | t            | 6.8           |
| —C <sup>5</sup> H—                              | 69.53         | 4.03          | dd           | 7.6           |
| —C <sup>6</sup> H—<br>(*acylated<br>C' 173.56)  | 63.29         | 4.30          | dd           | 5.3           |
| —C <sup>6</sup> 'H—<br>(*acylated<br>C' 173.56) | 63.29         | 4.32          | dd           | 5.5           |

| $\beta$ -Glucose                                | C Shift [ppm] | H Shift [ppm] | Multiplicity | Coupling [Hz] |
|-------------------------------------------------|---------------|---------------|--------------|---------------|
| —C <sup>1</sup> H—O—                            | 96.97         | 4.63          | d            | 7.02          |
| —C <sup>2</sup> H—                              | 73.61         | 3.34          | t            | 7.8           |
| —C <sup>3</sup> H—                              | 76.42         | 3.55          | Overlap      | n.d.          |
| —C <sup>4</sup> H—                              | 70.19         | 3.45          | Overlap      | n.d.          |
| —C <sup>5</sup> H—                              | 76.41         | 3.54          | t            | 6.7           |
| —C <sup>6</sup> H—<br>(*acylated<br>C' 173.91)  | 63.29         | 4.38          | dd           | 4.84          |
| —C <sup>6</sup> 'H—<br>(*acylated<br>C' 173.91) | 63.29         | 4.4           | dd           | 4.84          |

| $\beta$ -Xylose                                | C Shift [ppm] | H Shift [ppm] | Multiplicity | Coupling [Hz] |
|------------------------------------------------|---------------|---------------|--------------|---------------|
| —C <sup>1</sup> H—                             | 79.63         | 5.21          | t            | 7.8           |
| —C <sup>2</sup> H—                             | 72.65         | 3.56          | Overlap      | n.d.          |
| —C <sup>3</sup> H—                             | 71.23         | 3.95          | t            | 8.7           |
| —C <sup>4</sup> H—<br>(*acylated<br>C' 173.08) | 71.36         | 4.79          | ddd          | 9.1           |
| —C <sup>5</sup> H—                             | 58.95         | 3.75          | d            | 5.36          |
| —C <sup>5</sup> 'H—                            | 58.95         | 3.73          | d            | 5.8           |
